# Supplementary material for: Hydrated and fluorinated potassium scandium phosphates: topology symmetry analysis and structure prediction
Source: Royal Society of Chemistry journal article supplement (doi:10.1039/d4nj04229h), 2024-01-01
Supplement: d4nj04229h1.pdf [file d4nj04229h1.pdf]

**Table S1.** Crystal data and structure refinement for new K,Sc-phosphates.

| formula                                                                      | <b>KSc(HPO<sub>4</sub>)<sub>2</sub> (I)</b>                                 | <b>KSc(HPO<sub>4</sub>)<sub>2</sub> (I')</b>                                                          | <b>K<sub>3</sub>Sc<sub>3</sub>(P<sub>3</sub>O<sub>10</sub>F<sub>2</sub>)F<sub>5</sub> (III)</b> |
|------------------------------------------------------------------------------|-----------------------------------------------------------------------------|-------------------------------------------------------------------------------------------------------|-------------------------------------------------------------------------------------------------|
| formula weight (g/mol)                                                       | 276.01                                                                      | 276.01                                                                                                | 638.09                                                                                          |
| T (K)                                                                        | 293                                                                         | 150                                                                                                   | 150                                                                                             |
| crystal system                                                               | Orthorhombic                                                                | Monoclinic                                                                                            | Orthorhombic                                                                                    |
| space group, Z                                                               | <i>Pnam</i> , 4                                                             | <i>P</i> 1 2 <sub>1</sub> /c 1, 4                                                                     | <i>Cmc</i> 2 <sub>1</sub> , 4                                                                   |
| Unit cell parameters                                                         | <i>a</i> = 14.5271(6) Å<br><i>b</i> = 8.4948(3) Å<br><i>c</i> = 5.4375(2) Å | <i>a</i> = 5.4366(3) Å<br><i>b</i> = 8.4565(4) Å<br><i>c</i> = 14.4529(8) Å<br><i>β</i> = 90.185(4) ° | <i>a</i> = 15.6067(9) Å<br><i>b</i> = 8.8198(5) Å<br><i>c</i> = 11.2063(6) Å                    |
| V (Å <sup>3</sup> )                                                          | 671.01(4)                                                                   | 664.46(6)                                                                                             | 1542.52(15)                                                                                     |
| crystal size (mm)                                                            | 0.15x0.03x0.03                                                              | 0.15x0.03x0.03                                                                                        | 0.1x0.04x0.01                                                                                   |
| ρ <sub>calcd</sub> (g/cm <sup>3</sup> )                                      | 2.712                                                                       | 2.739                                                                                                 | 2.748                                                                                           |
| μ (mm <sup>-1</sup> )                                                        | 2.200                                                                       | 2.221                                                                                                 | 2.527                                                                                           |
| F(000)                                                                       | 536                                                                         | 536                                                                                                   | 1232                                                                                            |
| wavelength (Å)                                                               | 0.71073                                                                     | 0.71073                                                                                               | 0.71073                                                                                         |
| θ range/deg.                                                                 | 2.778 - 27.868                                                              | 2.791 - 27.873                                                                                        | 2.653 - 28.277                                                                                  |
| limiting indices                                                             | -18 ≤ <i>h</i> ≤ 19,<br>-11 ≤ <i>k</i> ≤ 11,<br>-7 ≤ <i>l</i> ≤ 7           | -7 ≤ <i>h</i> ≤ 7,<br>-11 ≤ <i>k</i> ≤ 11,<br>-18 ≤ <i>l</i> ≤ 18                                     | -20 ≤ <i>h</i> ≤ 20,<br>-11 ≤ <i>k</i> ≤ 11,<br>-14 ≤ <i>l</i> ≤ 14                             |
| refl. collected / unique                                                     | 4577 / 882                                                                  | 6175 / 1570                                                                                           | 6613 / 1966                                                                                     |
| R <sub>int</sub>                                                             | 0.0263                                                                      | 0.0326                                                                                                | 0.0536                                                                                          |
| completeness to theta, %                                                     | 100                                                                         | 100                                                                                                   | 99.9                                                                                            |
| data / restraints / parameters                                               | 882 / 0 / 67                                                                | 1570 / 0 / 99                                                                                         | 1966 / 1 / 117                                                                                  |
| GOF                                                                          | 1.108                                                                       | 1.151                                                                                                 | 1.152                                                                                           |
| R <sub>1</sub> , wR <sub>2</sub> <sup>(a)</sup> [ <i>I</i> > 2σ( <i>I</i> )] | 0.0330, 0.0947                                                              | 0.0653, 0.1797                                                                                        | 0.0535, 0.1174                                                                                  |
| R <sub>1</sub> , wR <sub>2</sub> (all data) <sup>(a)</sup>                   | 0.0357, 0.0974                                                              | 0.0682, 0.1813                                                                                        | 0.0643, 0.1385                                                                                  |
| Δρ max and Δρ min (e.Å <sup>-3</sup> )                                       | 1.001 and -0.731                                                            | 1.087 and -1.390                                                                                      | 1.442 and -1.534                                                                                |

$$^a R(F) = \sum ||F_o| - |F_c|| / \sum |F_o| \text{ and } wR_2 = [\sum w(F_o^2 - F_c^2)^2 / \sum w(F_o^2)^2]^{1/2} \text{ for } F_o^2 > 2\sigma(F_o^2)$$

**Table S2.** Atomic coordinates (x10<sup>4</sup>) and equivalent isotropic displacement parameters (Å<sup>2</sup>x10<sup>3</sup>) for KSc(HPO<sub>4</sub>)<sub>2</sub> (I) and KSc(HPO<sub>4</sub>)<sub>2</sub> (I'). U<sub>eq</sub> is defined as one third of the trace of the orthogonalized U<sub>ij</sub> tensor.

| Atoms                                       | X       | Y       | Z       | U <sub>eq</sub> |
|---------------------------------------------|---------|---------|---------|-----------------|
| <b>KSc(HPO<sub>4</sub>)<sub>2</sub> (I)</b> |         |         |         |                 |
| Sc                                          | 3766(1) | 1697(1) | 2500    | 5.6(2)          |
| K                                           | 1202(1) | 0335(1) | 2500    | 25.7(3)         |
| P1                                          | 5160(1) | 2060(1) | 7500    | 5.8(2)          |
| P2                                          | 2178(1) | 4776(1) | 2500    | 6.3(2)          |
| O1(OH)                                      | 6106(2) | 3002(4) | 7500    | 16.8(6)         |
| O2                                          | 4658(1) | 2614(2) | 9799(4) | 11.5(4)         |
| O3                                          | 5364(2) | 0312(3) | 7500    | 11.6(5)         |
| O4                                          | 3040(2) | 3776(3) | 2500    | 13.6(6)         |
| O5                                          | 2105(1) | 5762(2) | 0179(4) | 16.5(4)         |

|                                              |          |         |          |          |
|----------------------------------------------|----------|---------|----------|----------|
| O6(OH)                                       | 1345(2)  | 3559(4) | 2500     | 17.2(6)  |
| <b>KSc(HPO<sub>4</sub>)<sub>2</sub> (I')</b> |          |         |          |          |
| Sc                                           | 7512(2)  | 8285(1) | 6224(1)  | 2.5(3)   |
| K                                            | 7329(4)  | 9663(2) | 8795(1)  | 16.4(4)  |
| P1                                           | 2519(3)  | 7941(2) | 4833(1)  | 2.7(4)   |
| P2                                           | 3176(12) | 1588(6) | 7191(11) | 2.4(4)   |
| O1                                           | 2499(9)  | 9709(6) | 4658(3)  | 5.0(9)   |
| O2                                           | 0243(9)  | 7368(6) | 5345(3)  | 6.1(9)*  |
| O3(OH)                                       | 2515(10) | 7052(6) | 3866(3)  | 9.2(10)  |
| O4                                           | 5183(9)  | 4232(6) | 7924(3)  | 8.6(10)* |
| O5                                           | 4838(9)  | 7362(6) | 5315(3)  | 7.3(10)  |
| O6                                           | 7459(9)  | 6186(6) | 6947(3)  | 6.0(9)   |
| O7                                           | 9818(9)  | 4187(6) | 7871(4)  | 8.4(10)  |
| O8(OH)                                       | 7651(11) | 6427(6) | 8644(4)  | 11.6(11) |

\* This atoms were refinement in isotropic approximation.

**Table S3.** Atomic coordinates ( $\times 10^4$ ) and equivalent isotropic displacement parameters ( $\text{\AA}^2 \times 10^3$ ) for  $\text{K}_3\text{Sc}_3(\text{P}_3\text{O}_{10}\text{F}_2)\text{F}_5$  (III).  $U(\text{eq})$  is defined as one third of the trace of the orthogonalized  $U_{ij}$  tensor.

| Atoms | X       | Y        | Z        | $U_{\text{eq}}$ |
|-------|---------|----------|----------|-----------------|
| Sc1   | 5000    | 0691(3)  | 4749(3)  | 7.5(5)          |
| Sc2   | 6256(1) | 6916(2)  | 4661(2)  | 7.0(4)          |
| K1    | 5000    | 5927(4)  | 1818(3)  | 15.2(7)         |
| K2    | 7929(2) | 4791(3)  | 2042(3)  | 20.3(6)         |
| P1    | 6697(2) | 3110(3)  | 4857(3)  | 9.4(6)          |
| P2    | 5000    | 8134(5)  | 6854(4)  | 7.8(7)          |
| F1    | 5000    | 6346(11) | 4248(9)  | 12(2)           |
| F2    | 6541(5) | 6549(9)  | 2981(6)  | 15.2(15)        |
| F3    | 5901(4) | 9114(7)  | 4215(6)  | 11.2(13)        |
| F4    | 6777(6) | 6777(6)  | 3445(8)  | 28(2)           |
| O1    | 4198(6) | 7305(10) | 6420(7)  | 11.6(17)        |
| O2    | 5000    | 8097(13) | 8209(10) | 9(2)            |
| O3    | 6503(6) | 4723(10) | 5194(7)  | 12.4(17)*       |
| O4    | 5997(6) | 2087(10) | 5315(8)  | 12.5(17)        |
| O5    | 5000    | 9774(15) | 6420(11) | 17(3)           |
| O6    | 7565(6) | 2657(9)  | 5313(7)  | 8.7(16)*        |

\* This atoms were refinement in isotropic approximation.

**Table S4.** Selected interatomic distances for new K,Sc-phosphates.

| Atoms                             | Bonds ( $\text{\AA}$ ) | Atoms                             | Bonds ( $\text{\AA}$ ) | Atoms                                           | Bonds ( $\text{\AA}$ ) |
|-----------------------------------|------------------------|-----------------------------------|------------------------|-------------------------------------------------|------------------------|
| <b>(I)</b>                        |                        | <b>(I')</b>                       |                        | <b>(III)</b>                                    |                        |
| <u>ScO<sub>6</sub> octahedron</u> |                        | <u>ScO<sub>6</sub> octahedron</u> |                        | <u>Sc1O<sub>4</sub>F<sub>2</sub> octahedron</u> |                        |
| Sc-O4                             | 2.057(3)               | Sc-O6                             | 2.059(5)               | Sc1-O2                                          | 2.030(12)              |
| Sc-O5x2                           | 2.087(2)               | Sc-O4                             | 2.078(5)               | Sc1-O5                                          | 2.040(13)              |
| Sc-O2x2                           | 2.108(2)               | Sc-O7                             | 2.095(5)               | Sc1-F3x2                                        | 2.066(7)               |

|                                        |          |                                        |          |                                                 |           |
|----------------------------------------|----------|----------------------------------------|----------|-------------------------------------------------|-----------|
| Sc-O3                                  | 2.123(3) | Sc-O2                                  | 2.105(5) | Sc1-O4x2                                        | 2.083(8)  |
| <u>P1O<sub>3</sub>(OH) tetrahedron</u> |          | Sc-O5                                  | 2.106(5) | <u>Sc2O<sub>3</sub>F<sub>3</sub> octahedron</u> |           |
| P1-O3                                  | 1.514(3) | Sc-O1                                  | 2.122(5) | Sc2-F2                                          | 1.961(7)  |
| P1-O2x2                                | 1.522(2) | <u>P1O<sub>3</sub>(OH) tetrahedron</u> |          | Sc2-O3                                          | 2.060(9)  |
| P1-O1(OH)                              | 1.591(3) | P1-O1                                  | 1.517(5) | Sc2-F1                                          | 2.075(4)  |
| <u>P2O<sub>3</sub>(OH) tetrahedron</u> |          | P1-O5                                  | 1.519(5) | Sc2-F3                                          | 2.077(7)  |
| P2-O4                                  | 1.514(3) | P1-O2                                  | 1.522(5) | Sc2-O6                                          | 2.086(9)  |
| P2-O5x2                                | 1.519(2) | P1-O3(OH)                              | 1.587(5) | Sc2-O1                                          | 2.123(8)  |
| P2-O6(OH)                              | 1.591(3) | <u>P2O<sub>3</sub>(OH) tetrahedron</u> |          | <u>P1O<sub>3</sub>F tetrahedron</u>             |           |
|                                        |          | P2-O6                                  | 1.510(5) | P1-O6                                           | 1.501(9)  |
|                                        |          | P2-O4                                  | 1.516(5) | P1-O3                                           | 1.503(9)  |
|                                        |          | P2-O7                                  | 1.520(5) | P1-O4                                           | 1.507(9)  |
|                                        |          | P2-O8(OH)                              | 1.583(5) | P1-F4                                           | 1.591(9)  |
|                                        |          |                                        |          | <u>P2O<sub>4</sub> tetrahedron</u>              |           |
|                                        |          |                                        |          | P2-O2                                           | 1.519(11) |
|                                        |          |                                        |          | P2-O5                                           | 1.526(14) |
|                                        |          |                                        |          | P2-O1x2                                         | 1.528(9)  |
